# Supplementary material for: High photodetectivity of low-voltage flexible photodetectors assembled with hybrid aligned nanowire arrays
Source: Royal Society of Chemistry journal article supplement (doi:10.1039/c8tc01784k), 2018-01-01
Supplement: c8tc01784k1.pdf [file c8tc01784k1.pdf]

## High Photodetectivity in Low-Voltage Flexible Photodetectors Assembled with Hybrid Aligned Nanowire Arrays

Muhammad Shahid<sup>a</sup>, Jing Cheng<sup>a</sup>, Tianjun Li<sup>a</sup>, Muhammad Ajmal Khan<sup>c</sup>, Yuting Wang<sup>a</sup>, Yue Hu<sup>a</sup>, Mengfei Zhang<sup>a</sup>, Jun Yang<sup>a</sup>, Hafiz Sartaj Aziz<sup>a</sup>, Chunlei Wan<sup>a</sup>, Hiroki Nishijima<sup>b</sup>, and Wei Pan<sup>a\*</sup>

<sup>a</sup>State Key Laboratory of New Ceramics and Fine Processing, School of Materials Science and Engineering, Tsinghua University, Beijing 100084, People's Republic of China

<sup>b</sup>Functional Material Department, Inorganic Material Engineering Division, Toyota Motor Corporation, Toyota, Aichi 471-8572, Japan

<sup>c</sup>Department of Engineering Physics, Tsinghua University, Beijing 100084, People's Republic of China

\* Author to whom correspondence should be addressed.

Electronic mail: [panw@mail.tsinghua.edu.cn](mailto:panw@mail.tsinghua.edu.cn).

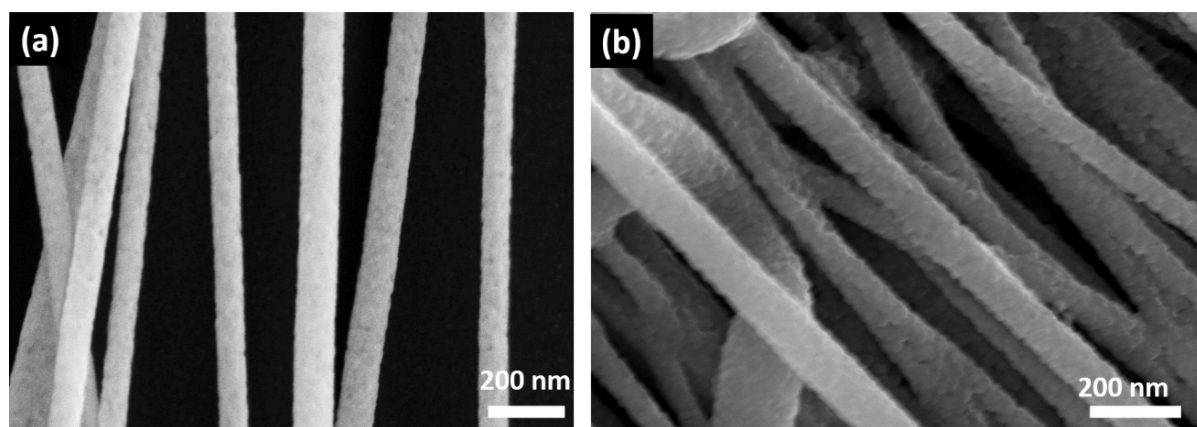

**Fig. S1** Scanning electron microscopy images of (a)  $\text{ZnGa}_2\text{O}_4$  (b)  $\text{ZnO}$  nanofibers.

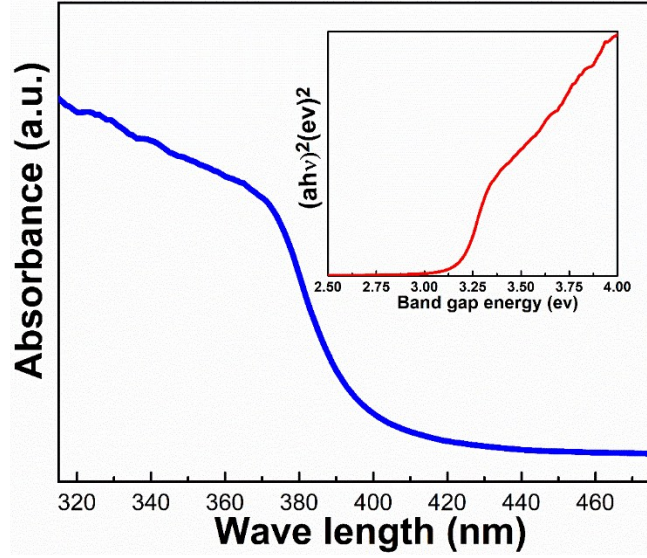

**Fig. S2** Absorbance of the hybrid ZnO-ZnGa<sub>2</sub>O<sub>4</sub> nanofibers (inset is the bandgap energy to the corresponding to the absorbance spectra).

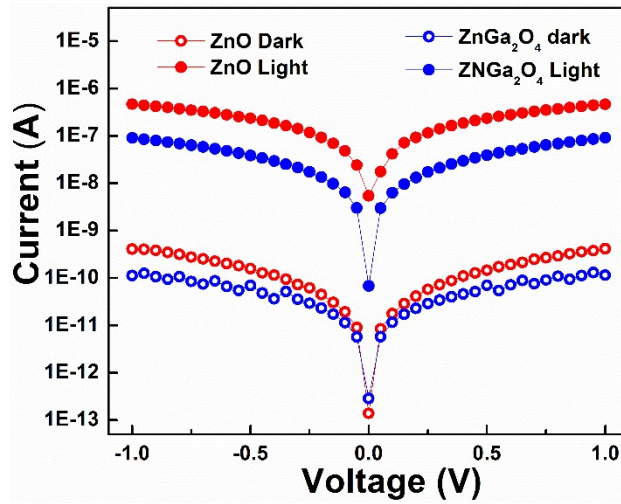

**Fig. S3 (a)** I-V curves of ZnO and ZnGa<sub>2</sub>O<sub>4</sub> nanofibers photodetector measured under 303 nm wavelengths of light with light power intensity 500  $\mu\text{W}/\text{cm}^2$ . I-V curves of ZnO and ZnGa<sub>2</sub>O<sub>4</sub> nanofibers photodetector measured under 303 nm wavelengths of light with light power intensity 500  $\mu\text{W}/\text{cm}^2$ .

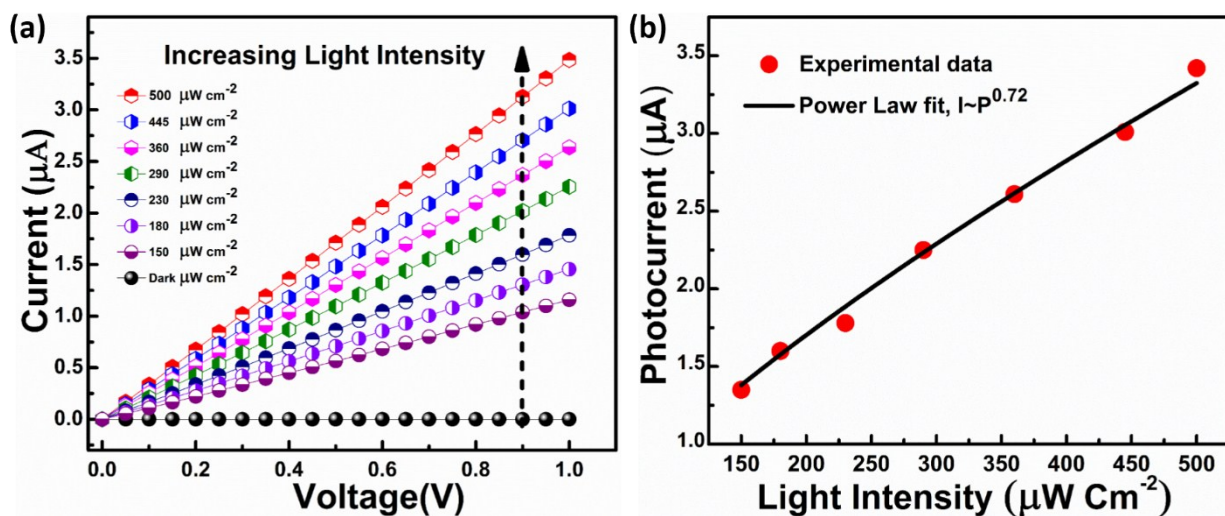

**Fig. S4** (a) I-V with variation in light power intensity under 303 nm wavelength of light. (b) Photocurrent vs light intensity and its power law fitting.

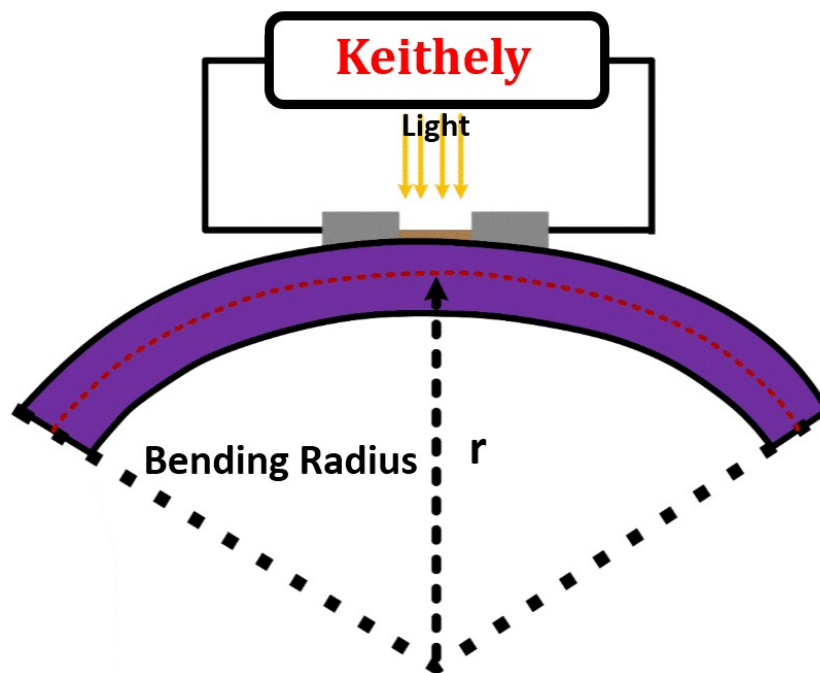

**Fig. S5** Schematic of the flexible device measurement setup

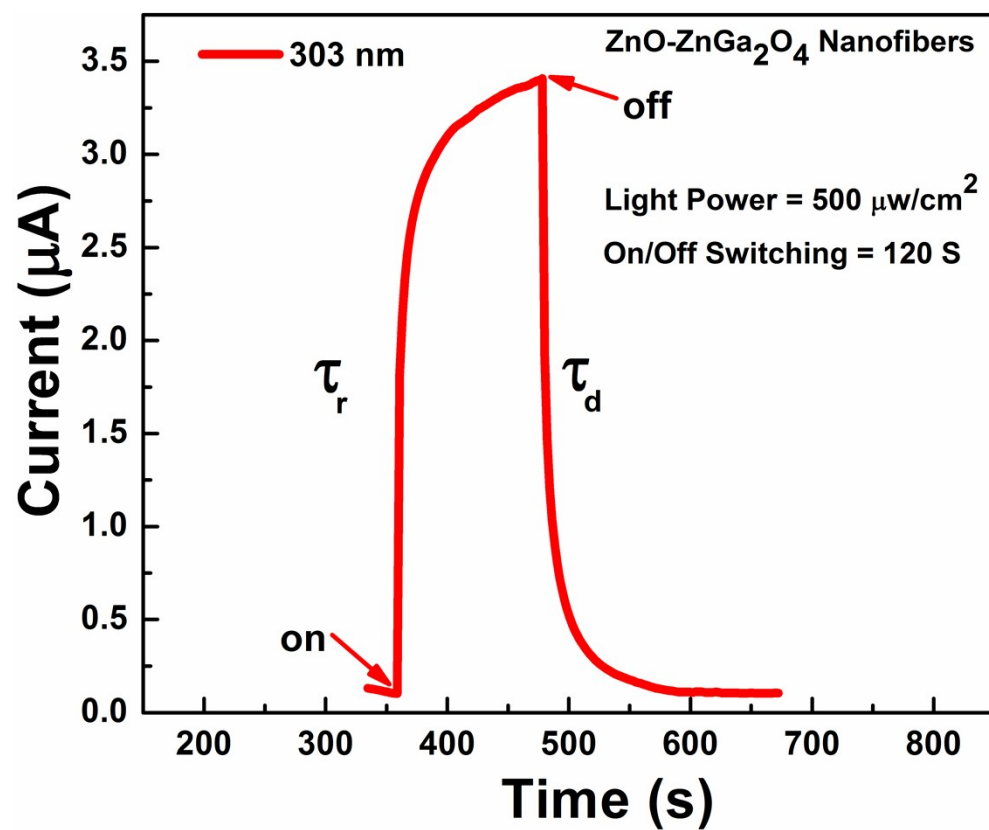

**Fig. S6** Time dependent Photoresponse for one on/off cycle
